# Supplementary material
Source: Springer Nature journal article supplement (https://www.springermedizin.de/resource/supplementary/12992_2013_262_MOESM1_ESM.pdf/9616222)
Supplement: MOESM1 [file 9616222]

**Additional file 1: TABLE S1 KEY ISSUES IN THE INTERVIEWS/FOCUS GROUP SESSIONS INVESTIGATED IN THE ENTIRE PROJECT AND TRIGGER QUESTIONS ON THE USE OF CHILD TRANSLATORS IN THE HEALTH SERVICES**

|                                                            | <b>Key issues</b>                 | <b>Trigger questions</b>                                                                                                                                                                                                                                                                                                                                                                                                                         |
|------------------------------------------------------------|-----------------------------------|--------------------------------------------------------------------------------------------------------------------------------------------------------------------------------------------------------------------------------------------------------------------------------------------------------------------------------------------------------------------------------------------------------------------------------------------------|
| <b>Individual interviews and focus groups of users</b>     | Overall opinion                   | <p>Have you used school age children to help as translators? Under what circumstances? Do you know of other people who have done this? What is your opinion of the use of children as translators? What do you think the professionals think of it? How does it affect the people involved? And what about health interaction?</p> <p>Any suggestions for minimizing the use of children as translators?</p> <p style="text-align: right;">↑</p> |
|                                                            | Health system                     |                                                                                                                                                                                                                                                                                                                                                                                                                                                  |
|                                                            | Development of health interaction |                                                                                                                                                                                                                                                                                                                                                                                                                                                  |
|                                                            | Treatment by professionals        |                                                                                                                                                                                                                                                                                                                                                                                                                                                  |
|                                                            | Communication with professionals  |                                                                                                                                                                                                                                                                                                                                                                                                                                                  |
|                                                            | Use of minors as translators      |                                                                                                                                                                                                                                                                                                                                                                                                                                                  |
| <b>Individual interview with cultural health mediators</b> | Role of mediators                 | <p>Do you know of users who use school age children as translators? Why do you think that this happens? What is your opinion of the use of children as translators? What do you think the professionals think of it? How does it affect the people involved? And what about health interaction?</p> <p>Any suggestions for minimizing the use of children as translators?</p> <p style="text-align: right;">↑</p>                                |
|                                                            | Maghrebi user's health needs      |                                                                                                                                                                                                                                                                                                                                                                                                                                                  |
|                                                            | Communication with professionals  |                                                                                                                                                                                                                                                                                                                                                                                                                                                  |
|                                                            | Use of minors as translators      |                                                                                                                                                                                                                                                                                                                                                                                                                                                  |
